# Supplementary material for: Low-cost and highly efficient composite visible light-driven Ag–AgBr/γ-Al2O3 plasmonic photocatalyst for degrading organic pollutants
Source: Royal Society of Chemistry journal article supplement (doi:10.1039/c2cy20074k), 2012-01-01
Supplement: c2cy20074k.pdf [file c2cy20074k.pdf]

## Supporting Information for

### Low-cost and highly efficient composite visible light-driven Ag-AgBr/ $\gamma$ -Al<sub>2</sub>O<sub>3</sub> plasmonic photocatalyst for degrading the organic pollutants

Yanyan Zhao, Long Kuai and Baoyou Geng\*

College of Chemistry and Materials Science, Anhui Key Laboratory of Functional Molecular Solids, Anhui Laboratory of Molecular-Based Materials, Anhui Normal university, Wuhu, 241000, P. R. China. Fax: (+86)-553-3869303; E-mail: [bygeng@mail.ahnu.edu.cn](mailto:bygeng@mail.ahnu.edu.cn).

#### Additional Figures and Figure Captions

**Figure S1**

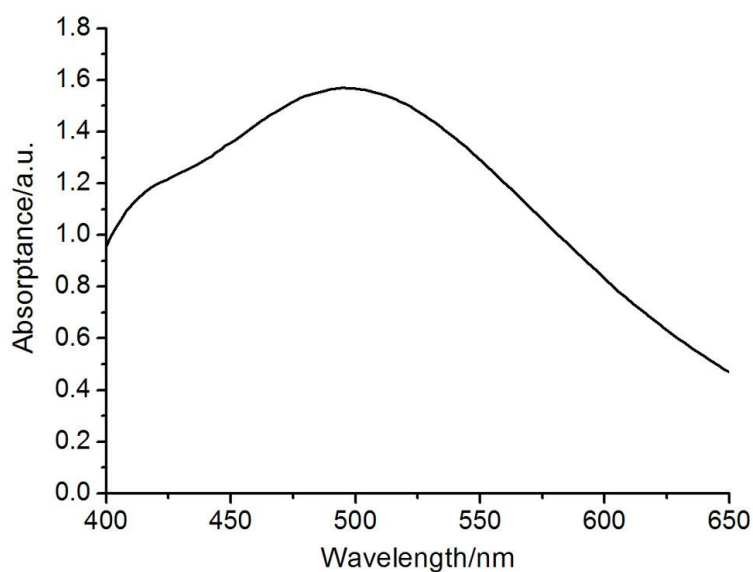

**Figure S1:** The UV-vis spectrum of Ag nanoparticles in water.

**Figure S2**

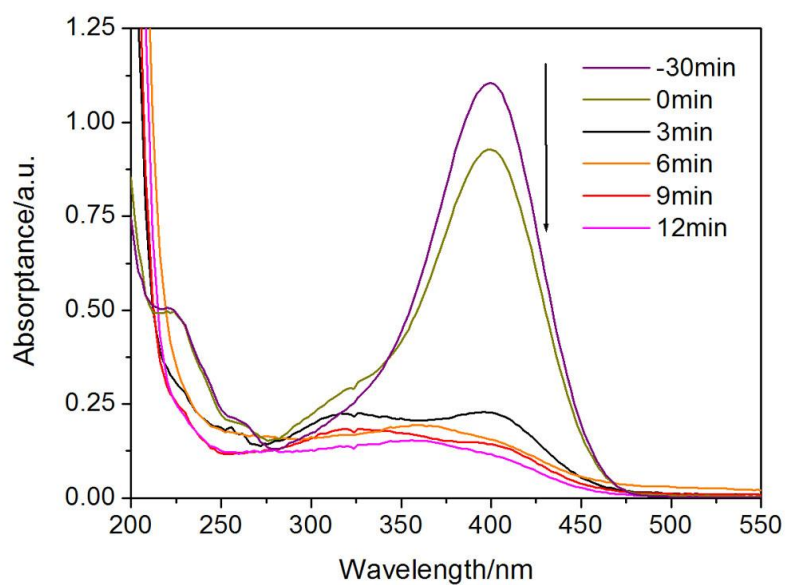

**Figure S2:** The UV/vis spectra of PNP after a certain time's visible light irradiation.

**Figure S3**

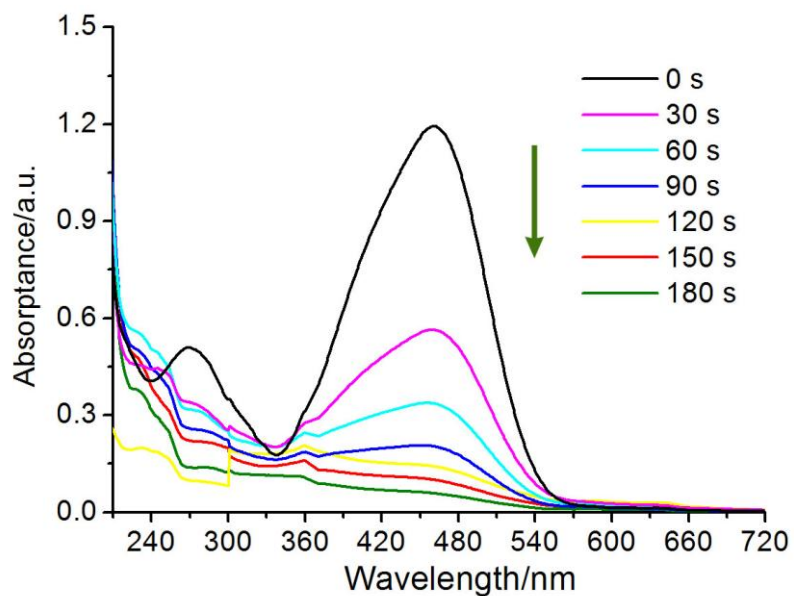

**Figure S3:** The UV/vis spectra of MO after a certain time's visible light irradiation.
